# Supplementary material
Source: HighWire-hosted journal article supplement (https://cmaj.ca/highwire/filestream/68725/field_highwire_adjunct_files/1/160816-res-2-at.pdf)
Supplement: 160816-res-2-at.pdf [file 160816-res-2-at.pdf]

**Appendix 2 (as supplied by the authors): Discharge Cohort: Descriptive Statistics Pre- and Post-Intervention**

| Observations                                            | Pre-Intervention |        |        |        | Post-Intervention |        |        |        |         |
|---------------------------------------------------------|------------------|--------|--------|--------|-------------------|--------|--------|--------|---------|
|                                                         | No Visit         |        | Visit  |        | No Visit          |        | Visit  |        |         |
|                                                         | Mean             | SD     | Mean   | SD     | Mean              | SD     | Mean   | SD     |         |
|                                                         | 85,812           |        | 29,649 |        | 140,812           |        | 48,301 |        |         |
| Female                                                  | .480             | .500   | .542   | .498   | .480              | .500   | .542   | .498   |         |
| Age                                                     | 47.60            | 20.75  | 41.32  | 16.33  | 47.58             | 21.83  | 40.38  | 16.91  |         |
| Neighbourhood Income Quintile                           |                  |        |        |        |                   |        |        |        |         |
|                                                         | 1                | .305   | .461   | .282   | .450              | .293   | .455   | .271   | .444    |
|                                                         | 2                | .214   | .410   | .208   | .406              | .211   | .408   | .210   | .407    |
|                                                         | 3                | .175   | .380   | .175   | .380              | .177   | .382   | .177   | .381    |
|                                                         | 4                | .164   | .370   | .168   | .374              | .169   | .374   | .176   | .380    |
|                                                         | 5                | .142   | .349   | .167   | .373              | .142   | .350   | .162   | .369    |
| Missing                                                 |                  | .009   | .093   | .006   | .077              | .008   | .087   | .005   | .071    |
| Resource Utilization Band Score*                        |                  |        |        |        |                   |        |        |        |         |
|                                                         | 0                | .006   | .075   | .0005  | .022              | .005   | .077   | .0004  | .019    |
|                                                         | 1                | .0012  | .035   | .00013 | .012              | .0010  | .032   | .00010 | .010    |
|                                                         | 2                | .020   | .139   | .013   | .115              | .020   | .141   | .015   | .121    |
|                                                         | 3                | .436   | .496   | .494   | .500              | .424   | .494   | .481   | .500    |
|                                                         | 4                | .291   | .454   | .316   | .465              | .288   | .453   | .321   | .467    |
|                                                         | 5                | .246   | .430   | .176   | .381              | .262   | .440   | .183   | .386    |
| Num. Aggregated Diagnosis Groups*                       |                  | 7.477  | 3.686  | 7.409  | 3.481             | 7.643  | 3.755  | 7.489  | 3.512   |
| Num. Mental Health Primary Care Billings in Prev. Year  |                  | 12.663 | 47.068 | 16.638 | 54.173            | 10.314 | 37.274 | 14.676 | 49.728  |
| Num. Non-Mental Health Primary Care Billings Prev. Year |                  | 22.176 | 75.501 | 26.097 | 73.800            | 21.552 | 75.325 | 24.050 | 76.207  |
| Num. Psychiatrist Billings Prev. Year                   |                  | 13.738 | 56.952 | 51.012 | 131.076           | 13.859 | 56.166 | 48.722 | 142.296 |
| Num. Psychiatric Admissions Prev. Year                  |                  | .023   | .160   | .027   | .173              | .022   | .158   | .026   | .169    |

\* Source: The Johns Hopkins ACG® System Ver 10.
